# Supplementary material
Source: Springer Nature journal article supplement (https://www.springermedizin.de/resource/supplementary/12885_2006_433_MOESM3_ESM.pdf/9470138)

|   |      |      |      |      |
|---|------|------|------|------|
| A | 857  | 1116 | 1136 | 1624 |
| B | 2576 | 4334 | 4681 | 5976 |
| C | 1650 | 1666 | 1727 | 2433 |

(A, B, C: most extreme outliers removed from figure 03)

CA 15-3 levels (kU/l)

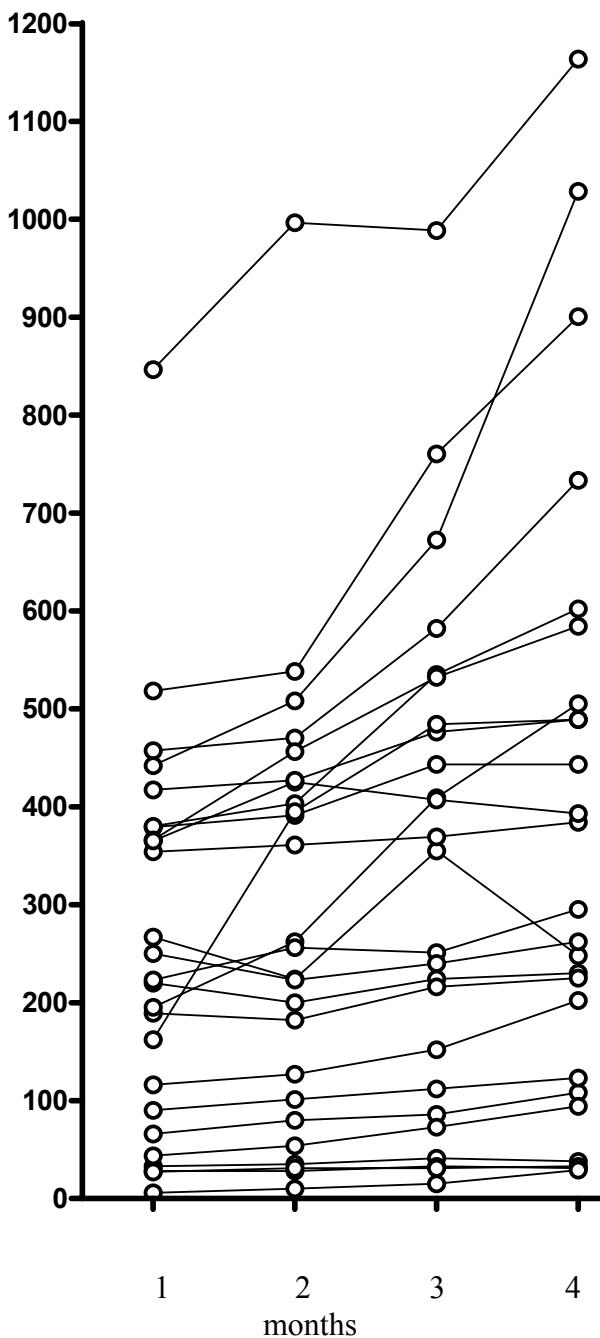

Supplement: MOESM3 [file 9470138]
